# Supplementary material for: A New Transgenic Mouse Model of Heart Failure and Cardiac Cachexia Raised by Sustained Activation of Met Tyrosine Kinase in the Heart
Source: Hindawi journal article supplement (doi:10.1155/2016/9549036), 2016-01-01
Supplement: f1 [file 9549036.f1.pdf]

**Supplementary Table 1: List of down-regulated transcripts (Fold Change>1.7 and p<0.05).** List of the transcripts downregulated by Tpr-Met in P27 cachectic gastrocnemius muscles. Shown are the transcripts gene annotation: *Mus Musculus* Entrez Gene ID, official symbol from NCBI, average (AVG) Log2 Ratio derived from Illumina microarrays (3 replicates/condition), fold change and p-value computations, Log2 ratio over AVG Log2 controls and full definition of the genes. All genes modulated with a fold change > 1.7 and p-value<0.05 are included.

| Entrez Gene ID | Symbol              | AVG Log2 Ratio | Fold Change | T-test | Ctrl   | Ctrl  | Ctrl  | TM    | TM    | TM     | Definition                                                                                                     |
|----------------|---------------------|----------------|-------------|--------|--------|-------|-------|-------|-------|--------|----------------------------------------------------------------------------------------------------------------|
| 26908          | <i>Eif2s3y</i>      | 3.598          | 12.1        | 0.000  | 0.146  | 0.248 | 0.102 | 3.712 | 3.571 | -3.510 | eukaryotic translation initiation factor 2, subunit 3, structural gene Y-linked (Eif2s3y), mRNA.               |
| 13628          | <i>Eef1a2</i>       | 1.333          | 2.5         | 0.011  | -0.444 | 0.261 | 0.183 | 1.503 | 0.950 | -1.546 | eukaryotic translation elongation factor 1 alpha 2 (Eef1a2), mRNA.                                             |
| 13628          | <i>Eef1a2</i>       | 1.298          | 2.5         | 0.031  | -0.383 | 0.275 | 0.108 | 1.632 | 0.605 | -1.656 | eukaryotic translation elongation factor 1 alpha 2 (Eef1a2), mRNA.                                             |
| 56222          | <i>Cited4</i>       | 1.268          | 2.4         | 0.029  | -0.466 | 0.035 | 0.431 | 1.109 | 0.889 | -1.805 | Cbp/p300-interacting transactivator, with Glu/Asp-rich carboxy-terminal domain, 4 (Cited4), mRNA.              |
| 18810          | <i>Plec1</i>        | 1.246          | 2.4         | 0.022  | -0.440 | 0.327 | 0.113 | 1.303 | 0.779 | -1.657 | plectin 1 (Plec1), transcript variant 10, mRNA.                                                                |
| 20741          | <i>Spnb1</i>        | 1.238          | 2.4         | 0.016  | -0.384 | 0.314 | 0.071 | 1.129 | 0.902 | -1.684 | spectrin beta 1 (Spnb1), mRNA.                                                                                 |
| 18642          | <i>Pfkm</i>         | 1.190          | 2.3         | 0.016  | -0.280 | 0.031 | 0.311 | 1.655 | 0.829 | -1.085 | phosphofructokinase, muscle (Pfkm), mRNA.                                                                      |
| 100046056      | <i>LOC100046056</i> | 1.143          | 2.2         | 0.039  | -0.275 | 0.533 | 0.258 | 1.516 | 0.620 | -1.294 | PREDICTED: similar to Pre-B-cell leukemia transcription factor interacting protein 1 (LOC100046056), mRNA.     |
| 13628          | <i>Eef1a2</i>       | 1.108          | 2.2         | 0.036  | -0.295 | 0.250 | 0.045 | 1.431 | 0.472 | -1.420 | eukaryotic translation elongation factor 1 alpha 2 (Eef1a2), mRNA.                                             |
| 12323          | <i>Camk2b</i>       | 1.089          | 2.1         | 0.015  | -0.332 | 0.319 | 0.013 | 1.163 | 0.728 | -1.376 | calcium/calmodulin-dependent protein kinase II, beta (Camk2b), mRNA.                                           |
| 20441          | <i>St3gal3</i>      | 1.076          | 2.1         | 0.010  | -0.377 | 0.337 | 0.039 | 1.166 | 0.864 | -1.199 | ST3 beta-galactoside alpha-2,3-sialyltransferase 3 (St3gal3), mRNA.                                            |
| 20190          | <i>Ryr1</i>         | 1.073          | 2.1         | 0.033  | -0.468 | 0.502 | 0.034 | 0.945 | 0.838 | -1.435 | ryanodine receptor 1, skeletal muscle (Ryr1), mRNA.                                                            |
| 19309          | <i>Pygm</i>         | 1.070          | 2.1         | 0.025  | -0.325 | 0.319 | 0.006 | 1.289 | 0.581 | -1.341 | muscle glycogen phosphorylase (Pygm), mRNA.                                                                    |
| 268859         | <i>A2bp1</i>        | 1.069          | 2.1         | 0.013  | -0.059 | 0.139 | 0.198 | 1.432 | 0.649 | -1.125 | RNA binding protein, fox-1 homolog (C. elegans) 1, mRNA                                                        |
| 216874         | <i>Camta2</i>       | 1.045          | 2.1         | 0.029  | -0.370 | 0.219 | 0.151 | 1.314 | 0.542 | -1.281 | calmodulin binding transcription activator 2 (Camta2), mRNA.                                                   |
| 11733          | <i>Ank1</i>         | 1.039          | 2.1         | 0.028  | -0.407 | 0.155 | 0.253 | 1.196 | 0.590 | -1.330 | ankyrin 1, erythroid (Ank1), mRNA.                                                                             |
| 68440          | <i>Dusp23</i>       | 1.019          | 2.0         | 0.032  | -0.366 | 0.119 | 0.247 | 1.483 | 0.600 | -0.974 | dual specificity phosphatase 23 (Dusp23), mRNA.                                                                |
| 14683          | <i>Gnas</i>         | 1.013          | 2.0         | 0.044  | -0.464 | 0.105 | 0.360 | 1.495 | 0.652 | -0.893 | GNAS (guanine nucleotide binding protein, alpha stimulating) complex locus (Gnas), transcript variant 3, mRNA. |
| 12372          | <i>Casq1</i>        | 1.013          | 2.0         | 0.000  | 0.016  | 0.006 | 0.010 | 1.167 | 0.912 | -0.962 | calsequestrin 1 (Casq1), nuclear gene encoding mitochondrial protein, mRNA.                                    |

|        |                 |            |     |       |        |       |       |            |            |        |                                                                                                                |
|--------|-----------------|------------|-----|-------|--------|-------|-------|------------|------------|--------|----------------------------------------------------------------------------------------------------------------|
| 56449  | <i>Csda</i>     | -<br>1.013 | 2.0 | 0.026 | -0.433 | 0.054 | 0.379 | -<br>1.355 | -<br>0.797 | -0.887 | cold shock domain protein A (Csda), mRNA.                                                                      |
| 233335 | <i>Synn</i>     | -<br>0.994 | 2.0 | 0.005 | -0.330 | 0.281 | 0.049 | 1.014      | 0.966      | -1.001 | synemin, intermediate filament protein (Synn), transcript variant 3, mRNA.                                     |
| 76454  | <i>Fbxo31</i>   | -<br>0.992 | 2.0 | 0.026 | -0.303 | 0.380 | 0.078 | 1.310      | 0.610      | -1.055 | F-box protein 31 (Fbxo31), mRNA.                                                                               |
| 72333  | <i>Palld</i>    | -<br>0.992 | 2.0 | 0.020 | -0.264 | 0.362 | 0.098 | 1.239      | 0.620      | -1.116 | palladin, cytoskeletal associated protein (Palld), mRNA.                                                       |
| 14683  | <i>Gnas</i>     | -<br>0.990 | 2.0 | 0.032 | -0.386 | 0.000 | 0.386 | 1.411      | 0.741      | -0.818 | GNAS (guanine nucleotide binding protein, alpha stimulating) complex locus (Gnas), transcript variant 8, mRNA. |
| 15516  | <i>Hsp90ab1</i> | -<br>0.989 | 2.0 | 0.013 | -0.232 | 0.067 | 0.165 | 1.163      | 0.587      | -1.217 | heat shock protein 90kDa alpha (cytosolic), class B member 1 (Hsp90ab1), mRNA.                                 |
| 360013 | <i>Myo18a</i>   | -<br>0.983 | 2.0 | 0.020 | -0.349 | 0.363 | 0.015 | 1.013      | 0.691      | -1.244 | myosin XVIIIa (Myo18a), mRNA.                                                                                  |
| 12295  | <i>Cacnb1</i>   | -<br>0.972 | 2.0 | 0.030 | -0.402 | 0.398 | 0.005 | 1.042      | 0.624      | -1.250 | calcium channel, voltage-dependent, beta 1 subunit (Cacnb1), mRNA                                              |
| 75613  | <i>Med25</i>    | -<br>0.970 | 2.0 | 0.023 | -0.349 | 0.329 | 0.020 | 1.183      | 0.593      | -1.133 | mediator of RNA polymerase II transcription, subunit 25 homolog (yeast) (Med25), mRNA.                         |
| 27373  | <i>Csnk1e</i>   | -<br>0.962 | 1.9 | 0.016 | -0.345 | 0.212 | 0.134 | 1.259      | 0.701      | -0.926 | casein kinase 1, epsilon (Csnk1e), mRNA.                                                                       |
| 14431  | <i>Gamt</i>     | -<br>0.954 | 1.9 | 0.038 | -0.186 | 0.171 | 0.015 | 0.859      | 0.495      | -1.506 | guanidinoacetate methyltransferase (Gamt), mRNA.                                                               |
| 15516  | <i>Hsp90ab1</i> | -<br>0.949 | 1.9 | 0.045 | -0.381 | 0.366 | 0.015 | 1.262      | 0.457      | -1.126 | heat shock protein 90kDa alpha (cytosolic), class B member 1 (Hsp90ab1), mRNA.                                 |
| 11481  | <i>Acvr2b</i>   | -<br>0.946 | 1.9 | 0.004 | -0.237 | 0.178 | 0.060 | 0.806      | 0.906      | -1.126 | activin receptor IIB (Acvr2b), mRNA.                                                                           |
| 13728  | <i>Mark2</i>    | -<br>0.945 | 1.9 | 0.027 | -0.238 | 0.263 | 0.025 | 1.350      | 0.527      | -0.959 | MAP/microtubule affinity-regulating kinase 2 (Mark2), transcript variant 4, mRNA.                              |
| 11733  | <i>Ank1</i>     | -<br>0.916 | 1.9 | 0.043 | -0.472 | 0.145 | 0.327 | 0.977      | 0.546      | -1.225 | ankyrin 1, erythroid (Ank1), mRNA.                                                                             |
| 13549  | <i>Dyrk1b</i>   | -<br>0.915 | 1.9 | 0.028 | -0.391 | 0.269 | 0.122 | 1.147      | 0.550      | -1.049 | dual-specificity tyrosine-(Y)-phosphorylation regulated kinase 1b (Dyrk1b), transcript variant 1, mRNA.        |
| 58522  | <i>Trim54</i>   | -<br>0.906 | 1.9 | 0.045 | -0.328 | 0.196 | 0.132 | 1.092      | 0.381      | -1.247 | tripartite motif-containing 54 (Trim54), mRNA.                                                                 |
| 17762  | <i>Mapt</i>     | -<br>0.906 | 1.9 | 0.039 | -0.265 | 0.338 | 0.073 | 1.009      | 0.449      | -1.261 | microtubule-associated protein tau (Mapt), mRNA                                                                |
| 67834  | <i>Idh3a</i>    | -<br>0.904 | 1.9 | 0.031 | -0.190 | 0.231 | 0.041 | 0.861      | 0.495      | -1.357 | isocitrate dehydrogenase 3 (NAD+) alpha (Idh3a), nuclear gene encoding mitochondrial protein, mRNA.            |
| 14387  | <i>Gaa</i>      | -<br>0.895 | 1.9 | 0.011 | -0.269 | 0.184 | 0.084 | 0.952      | 0.617      | -1.115 | glucosidase, alpha, acid (Gaa), mRNA.                                                                          |
| 11975  | <i>Atp6v0a1</i> | -<br>0.894 | 1.9 | 0.047 | -0.387 | 0.285 | 0.101 | 1.201      | 0.415      | -1.067 | ATPase, H+ transporting, lysosomal V0 subunit A1 (Atp6v0a1), mRNA                                              |
| 68097  | <i>Dynll2</i>   | -<br>0.892 | 1.9 | 0.012 | -0.252 | 0.098 | 0.154 | 1.059      | 0.570      | -1.048 | dynein light chain LC8-type 2 (Dynll2), mRNA.                                                                  |
| 18747  | <i>Prkaca</i>   | -<br>0.891 | 1.9 | 0.018 | -0.260 | 0.093 | 0.167 | 1.009      | 0.525      | -1.140 | protein kinase, cAMP dependent, catalytic, alpha (Prkaca), mRNA.                                               |
| 239102 | <i>Zfhx2</i>    | -<br>0.890 | 1.9 | 0.026 | -0.229 | 0.275 | 0.046 | 1.074      | 0.468      | -1.128 | zinc finger homeobox 2 (Zfhx2), mRNA.                                                                          |
| 70209  | <i>Tmem143</i>  | -<br>0.888 | 1.9 | 0.048 | -0.521 | 0.365 | 0.156 | 1.087      | 0.556      | -1.020 | transmembrane protein 143 (Tmem143), mRNA.                                                                     |

|        |                 |            |     |       |        |       |            |            |            |        |                                                                                                                                                       |
|--------|-----------------|------------|-----|-------|--------|-------|------------|------------|------------|--------|-------------------------------------------------------------------------------------------------------------------------------------------------------|
| 20340  | <i>Glg1</i>     | -<br>0.884 | 1.8 | 0.024 | -0.157 | 0.366 | -<br>0.210 | -<br>0.911 | -<br>0.579 | -1.162 | golgi apparatus protein 1 (Glg1), mRNA.                                                                                                               |
| 11906  | <i>Zfhx3</i>    | -<br>0.883 | 1.8 | 0.033 | -0.463 | 0.166 | 0.297      | 1.170      | 0.678      | -0.801 | zinc finger homeobox 3 (Zfhx3), mRNA.                                                                                                                 |
| 15516  | <i>Hsp90ab1</i> | -<br>0.876 | 1.8 | 0.018 | -0.377 | 0.164 | 0.213      | 1.039      | 0.637      | -0.953 | heat shock protein 90kDa alpha (cytosolic), class B member 1 (Hsp90ab1), mRNA.                                                                        |
| 22195  | <i>Ube2l3</i>   | -<br>0.870 | 1.8 | 0.027 | -0.301 | 0.217 | 0.084      | 1.001      | 0.472      | -1.138 | ubiquitin-conjugating enzyme E2L 3 (Ube2l3), mRNA.                                                                                                    |
| 22084  | <i>Tsc2</i>     | -<br>0.857 | 1.8 | 0.026 | -0.299 | 0.491 | 0.192      | 0.857      | 0.843      | -0.869 | Mtuberous sclerosis 2 (Tsc2), transcript variant 2, mRNA.                                                                                             |
| 242705 | <i>E2f2</i>     | -<br>0.855 | 1.8 | 0.024 | 0.040  | 0.243 | 0.283      | 0.636      | 0.699      | -1.229 | E2F transcription factor 2 (E2f2), mRNA.                                                                                                              |
| 67273  | <i>Ndufa10</i>  | -<br>0.850 | 1.8 | 0.034 | -0.244 | 0.205 | 0.039      | 1.056      | 0.381      | -1.114 | NADH dehydrogenase (ubiquinone) 1 alpha subcomplex 10 (Ndufa10), nuclear gene encoding mitochondrial protein, mRNA.                                   |
| 11565  | <i>Adssl1</i>   | -<br>0.849 | 1.8 | 0.050 | -0.305 | 0.054 | 0.359      | 1.317      | 0.555      | -0.676 | adenylosuccinate synthetase like 1 (Adssl1), mRNA.                                                                                                    |
| 116904 | <i>Alpk3</i>    | -<br>0.845 | 1.8 | 0.015 | -0.207 | 0.306 | 0.099      | 1.104      | 0.638      | -0.794 | alpha-kinase 3 (Alpk3), mRNA.                                                                                                                         |
| 22195  | <i>Ube2l3</i>   | -<br>0.843 | 1.8 | 0.015 | -0.259 | 0.148 | 0.111      | 0.941      | 0.534      | -1.054 | ubiquitin-conjugating enzyme E2L 3 (Ube2l3), mRNA.                                                                                                    |
| 239102 | <i>Zfhx2</i>    | -<br>0.843 | 1.8 | 0.013 | -0.173 | 0.123 | 0.050      | 1.125      | 0.519      | -0.886 | zinc finger homeobox 2 (Zfhx2), mRNA.                                                                                                                 |
| 230721 | <i>Pabpc4</i>   | -<br>0.839 | 1.8 | 0.046 | -0.467 | 0.260 | 0.206      | 1.033      | 0.487      | -0.996 | poly A binding protein, cytoplasmic 4 (Pabpc4), transcript variant 2, mRNA.                                                                           |
| 84585  | <i>Rnf123</i>   | -<br>0.835 | 1.8 | 0.037 | -0.459 | 0.306 | 0.153      | 0.976      | 0.555      | -0.975 | ring finger protein 123 (Rnf123), mRNA.                                                                                                               |
| 22084  | <i>Tsc2</i>     | -<br>0.827 | 1.8 | 0.012 | -0.258 | 0.287 | 0.028      | 0.769      | 0.681      | -1.032 | tuberous sclerosis 2 (Tsc2), transcript variant 1, mRNA.                                                                                              |
| 70383  | <i>Cox10</i>    | -<br>0.825 | 1.8 | 0.036 | -0.255 | 0.097 | 0.158      | 1.122      | 0.369      | -0.985 | COX10 homolog, cytochrome c oxidase assembly protein, heme A: farnesyltransferase (yeast) (Cox10), nuclear gene encoding mitochondrial protein, mRNA. |
| 224727 | <i>Bat3</i>     | -<br>0.825 | 1.8 | 0.041 | -0.405 | 0.252 | 0.153      | 1.015      | 0.450      | -1.009 | HLA-B-associated transcript 3 (Bat3), mRNA.                                                                                                           |
| 15467  | <i>Eif2ak1</i>  | -<br>0.817 | 1.8 | 0.012 | -0.076 | 0.197 | 0.121      | 0.911      | 0.508      | -1.030 | eukaryotic translation initiation factor 2 alpha kinase 1 (Eif2ak1), mRNA                                                                             |
| 110198 | <i>Akr7a5</i>   | -<br>0.812 | 1.8 | 0.040 | -0.443 | 0.282 | 0.161      | 1.096      | 0.572      | -0.768 | aldo-keto reductase family 7, member A5 (aflatoxin aldehyde reductase) (Akr7a5), mRNA.                                                                |
| 18604  | <i>Pdk2</i>     | -<br>0.811 | 1.8 | 0.033 | -0.296 | 0.310 | 0.014      | 1.118      | 0.479      | -0.836 | pyruvate dehydrogenase kinase, isoenzyme 2 (Pdk2), mRNA.                                                                                              |
| 22378  | <i>Wbp2</i>     | -<br>0.810 | 1.8 | 0.033 | -0.238 | 0.167 | 0.070      | 1.089      | 0.371      | -0.968 | WW domain binding protein 2 (Wbp2), mRNA.                                                                                                             |
| 216850 | <i>Jmjd3</i>    | -<br>0.796 | 1.7 | 0.032 | -0.426 | 0.102 | 0.324      | 0.682      | 0.699      | -1.006 | jumonji domain containing 3 (Jmjd3), mRNA.                                                                                                            |
| 11474  | <i>Actn3</i>    | -<br>0.791 | 1.7 | 0.037 | -0.410 | 0.368 | 0.042      | 0.573      | 0.794      | -1.006 | actinin alpha 3 (Actn3), mRNA.                                                                                                                        |
| 16502  | <i>Kcnc1</i>    | -<br>0.791 | 1.7 | 0.004 | -0.116 | 0.113 | 0.003      | 1.021      | 0.707      | -0.644 | potassium voltage gated channel, Shaw-related subfamily, member 1 (Kcnc1), mRNA.                                                                      |
| 69585  | <i>Hfe2</i>     | -<br>0.782 | 1.7 | 0.017 | -0.365 | 0.077 | 0.288      | 0.827      | 0.674      | -0.846 | hemochromatosis type 2 (juvenile) (human homolog) (Hfe2), mRNA.                                                                                       |
| 76454  | <i>Fbxo31</i>   | -<br>0.780 | 1.7 | 0.022 | -0.321 | 0.252 | 0.069      | 0.930      | 0.520      | -0.889 | F-box protein 31 (Fbxo31), mRNA.                                                                                                                      |

|        |              |            |     |       |        |       |       |            |            |        |                                                                                                            |
|--------|--------------|------------|-----|-------|--------|-------|-------|------------|------------|--------|------------------------------------------------------------------------------------------------------------|
| 12345  | <i>Capzb</i> | -<br>0.776 | 1.7 | 0.031 | -0.324 | 0.151 | 0.173 | -<br>0.872 | -<br>0.439 | -1.018 | capping protein (actin filament) muscle Z-line, beta (Capzb), transcript variant 1, mRNA.                  |
| 233870 | <i>Tufm</i>  | -<br>0.774 | 1.7 | 0.036 | -0.318 | 0.265 | 0.053 | -<br>0.819 | -<br>0.441 | -1.063 | Tu translation elongation factor, mitochondrial (Tufm), nuclear gene encoding mitochondrial protein, mRNA. |
| 30839  | <i>Fbxw5</i> | -<br>0.774 | 1.7 | 0.024 | -0.296 | 0.173 | 0.123 | -<br>0.874 | -<br>0.459 | -0.988 | F-box and WD-40 domain protein 5 (Fbxw5), mRNA.                                                            |
| 15427  | <i>Hoxc9</i> | -<br>0.769 | 1.7 | 0.041 | -0.399 | 0.145 | 0.254 | -<br>0.926 | -<br>0.444 | -0.935 | homeo box C9 (Hoxc9), mRNA.                                                                                |
| 70427  | <i>Mier2</i> | -<br>0.766 | 1.7 | 0.021 | -0.245 | 0.158 | 0.087 | -<br>0.958 | -<br>0.438 | -0.902 | mesoderm induction early response 1, family member 2 (Mier2), mRNA                                         |

**Supplementary Table 2: List of up-regulated genes (Fold Change>1.7 and p<0.05).** List of the transcripts upregulated by Tpr-Met in P27 cachectic gastrocnemius muscles. Shown are the transcripts gene annotation: *Mus Musculus* Entrez Gene ID, official symbol from NCBI, average (AVG) Log2 Ratio derived from Illumina microarrays (3 replicates/condition), fold change and p-value computations, Log2 ratio over AVG Log2 control values and full definition of the genes. All genes modulated with a fold change > 1.7 and p-value<0.05 are included.

| Entrez Gene ID | Symbol               | AVG Log2 Ratio | Fold Change | T-test | Ctrl   | Ctrl   | Ctrl   | TM    | TM    | TM    | Definition                                                                              |
|----------------|----------------------|----------------|-------------|--------|--------|--------|--------|-------|-------|-------|-----------------------------------------------------------------------------------------|
| 21754          | <i>Tesk1</i>         | 2.003          | 4.0         | 0.000  | -0.266 | 0.157  | 0.109  | 1.965 | 2.166 | 1.879 | testis specific protein kinase 1 (Tek1), mRNA.                                          |
| 20306          | <i>Ccl7</i>          | 1.617          | 3.1         | 0.047  | 0.234  | -0.006 | -0.228 | 0.621 | 1.689 | 2.541 | chemokine (C-C motif) ligand 7 (Ccl7), mRNA.                                            |
| 17841          | <i>Mup2</i>          | 1.420          | 2.7         | 0.004  | 0.263  | 0.037  | -0.300 | 1.207 | 1.760 | 1.292 | major urinary protein 2 (Mup2), transcript variant 1, mRNA.                             |
| 107652         | <i>Uap1</i>          | 1.380          | 2.6         | 0.034  | 0.321  | -0.289 | -0.032 | 0.581 | 1.725 | 1.833 | UDP-N-acetylglucosamine pyrophosphorylase 1 (Uap1), mRNA.                               |
| 20308          | <i>Ccl9</i>          | 1.328          | 2.5         | 0.041  | 0.347  | -0.288 | -0.059 | 0.566 | 1.460 | 1.957 | chemokine (C-C motif) ligand 9 (Ccl9), mRNA.                                            |
| 15439          | <i>Hp</i>            | 1.209          | 2.3         | 0.013  | -0.039 | 0.301  | -0.262 | 0.792 | 1.577 | 1.259 | haptoglobin (Hp), mRNA.                                                                 |
| 12522          | <i>Cd83</i>          | 1.180          | 2.3         | 0.014  | 0.383  | -0.082 | -0.302 | 0.889 | 1.097 | 1.553 | CD83 antigen (Cd83), mRNA.                                                              |
| 20229          | <i>LOC100047261</i>  | 1.133          | 2.2         | 0.013  | 0.337  | -0.389 | 0.052  | 1.195 | 0.829 | 1.376 | PREDICTED:similar to spermidine/spermine N1-acetyltransferase (LOC100047261), misc RNA. |
| 20194          | <i>S100a10</i>       | 1.123          | 2.2         | 0.039  | 0.264  | -0.515 | 0.251  | 0.681 | 1.090 | 1.599 | S100 calcium binding protein A10 (calpactin) (S100a10), mRNA.                           |
| 22320          | <i>Vamp8</i>         | 1.106          | 2.2         | 0.050  | 0.298  | 0.416  | -0.714 | 0.863 | 1.017 | 1.437 | vesicle-associated membrane protein 8 (Vamp8), mRNA.                                    |
| 13733          | <i>Emr1</i>          | 1.073          | 2.1         | 0.009  | 0.218  | -0.283 | 0.065  | 0.930 | 0.884 | 1.405 | EGF-like module containing, mucin-like, hormone receptor-like sequence 1 (Emr1), mRNA.  |
| 13106          | <i>Cyp2e1</i>        | 1.065          | 2.1         | 0.007  | -0.165 | 0.387  | -0.221 | 0.962 | 1.192 | 1.040 | cytochrome P450, family 2, subfamily e, polypeptide 1 (Cyp2e1), mRNA.                   |
| 11450          | <i>Adipoq</i>        | 1.061          | 2.1         | 0.026  | 0.340  | -0.034 | -0.306 | 0.696 | 0.965 | 1.520 | adiponectin, C1Q and collagen domain containing (Adipoq), mRNA.                         |
| 17105          | <i>Lyzs</i>          | 1.054          | 2.1         | 0.030  | 0.441  | -0.512 | 0.071  | 0.741 | 1.157 | 1.263 | lysozyme (Lyzs), mRNA.                                                                  |
| 232087         | <i>Mat2a</i>         | 1.033          | 2.0         | 0.013  | 0.178  | 0.244  | -0.422 | 1.263 | 0.909 | 0.927 | methionine adenosyltransferase II, alpha (Mat2a), mRNA.                                 |
| 12825          | <i>Col3a1</i>        | 1.004          | 2.0         | 0.009  | 0.092  | -0.386 | 0.294  | 0.883 | 1.025 | 1.104 | collagen, type III, alpha 1 (Col3a1), mRNA.                                             |
| 100689         | <i>Spon2</i>         | 0.996          | 2.0         | 0.034  | 0.189  | -0.001 | -0.187 | 1.457 | 1.086 | 0.444 | spondin 2, extracellular matrix protein (Spon2), mRNA.                                  |
| 12475          | <i>Cd14</i>          | 0.970          | 2.0         | 0.026  | 0.211  | -0.400 | 0.189  | 0.572 | 1.161 | 1.178 | CD14 antigen (Cd14), mRNA.                                                              |
| 620807         | <i>OTTMUSG000</i>    | 0.968          | 2.0         | 0.012  | 0.193  | 0.022  | -0.215 | 0.608 | 1.254 | 1.042 | predicted gene, 620807 (620807), mRNA.                                                  |
| 16600          | <i>Klf4</i>          | 0.957          | 1.9         | 0.021  | -0.132 | -0.195 | 0.327  | 1.355 | 0.766 | 0.749 | Kruppel-like factor 4 (gut) (Klf4), mRNA.                                               |
| 13479          | <i>Dpep1</i>         | 0.948          | 1.9         | 0.025  | 0.111  | -0.317 | 0.206  | 0.513 | 1.156 | 1.175 | dipeptidase 1 (renal) (Dpep1), mRNA.                                                    |
| 18295          | <i>Ogn</i>           | 0.940          | 1.9         | 0.045  | 0.348  | -0.522 | 0.174  | 0.625 | 0.916 | 1.278 | osteoglycin (Ogn), mRNA.                                                                |
| 65956          | <i>Ccl21c</i>        | 0.934          | 1.9         | 0.000  | 0.146  | -0.075 | -0.071 | 0.902 | 0.948 | 0.952 | chemokine (C-C motif) ligand 21c (leucine) (Ccl21c), mRNA.                              |
| 18295          | <i>Ogn</i>           | 0.932          | 1.9         | 0.029  | 0.162  | -0.360 | 0.198  | 0.720 | 0.721 | 1.355 | osteoglycin (Ogn), mRNA.                                                                |
| 27279          | <i>Tnfrsf12a</i>     | 0.929          | 1.9         | 0.048  | 0.064  | -0.413 | 0.349  | 0.535 | 0.874 | 1.377 | tumor necrosis factor receptor superfamily, member 12a (Tnfrsf12a), mRNA.               |
| 70717          | <i>6330406115Rik</i> | 0.928          | 1.9         | 0.044  | 0.338  | -0.587 | 0.249  | 0.724 | 0.906 | 1.153 | RIKEN cDNA 6330406115 gene (6330406115Rik), mRNA.                                       |
| 11745          | <i>Anxa3</i>         | 0.926          | 1.9         | 0.039  | 0.564  | -0.458 | -0.105 | 0.931 | 0.811 | 1.035 | annexin A3 (Anxa3), mRNA.                                                               |

|        |                      |       |     |       |        |        |        |       |       |       |                                                                                        |
|--------|----------------------|-------|-----|-------|--------|--------|--------|-------|-------|-------|----------------------------------------------------------------------------------------|
| 104725 | <i>1110002B05Rik</i> | 0.912 | 1.9 | 0.010 | 0.063  | -0.090 | 0.028  | 0.814 | 0.642 | 1.280 | RIKEN cDNA 1110002B05 gene (1110002B05Rik), mRNA.                                      |
| 13733  | <i>Emr1</i>          | 0.890 | 1.9 | 0.023 | 0.250  | -0.415 | 0.166  | 0.646 | 0.906 | 1.117 | EGF-like module containing, mucin-like, hormone receptor-like sequence 1 (Emr1), mRNA. |
| 17110  | <i>Lyz1</i>          | 0.884 | 1.8 | 0.037 | 0.072  | 0.090  | -0.163 | 0.402 | 0.897 | 1.353 | lysozyme 1 (Lyz1), mRNA.                                                               |
| 71145  | <i>Scara5</i>        | 0.879 | 1.8 | 0.026 | 0.283  | -0.472 | 0.190  | 0.744 | 0.834 | 1.058 | scavenger receptor class A, member 5 (putative) (Scara5), mRNA.                        |
| 64661  | <i>Krtdap</i>        | 0.860 | 1.8 | 0.040 | 0.234  | -0.261 | 0.027  | 0.464 | 0.798 | 1.318 | keratinocyte differentiation associated protein (Krtdap), mRNA. XM_923930 XM_923934    |
| 18829  | <i>Ccl21a</i>        | 0.851 | 1.8 | 0.000 | 0.127  | -0.007 | -0.120 | 0.876 | 0.906 | 0.770 | chemokine (C-C motif) ligand 21A (Ccl21a), mRNA.                                       |
| 78889  | <i>Wsb1</i>          | 0.845 | 1.8 | 0.047 | 0.466  | -0.409 | -0.056 | 1.154 | 0.713 | 0.667 | WD repeat and SOCS box-containing 1 (Wsb1), transcript variant 2, mRNA.                |
| 56429  | <i>Dpt</i>           | 0.842 | 1.8 | 0.028 | 0.303  | -0.429 | 0.126  | 0.630 | 0.861 | 1.036 | dermatopontin (Dpt), mRNA.                                                             |
| 80891  | <i>Msr2</i>          | 0.830 | 1.8 | 0.038 | 0.285  | -0.507 | 0.222  | 0.645 | 0.895 | 0.950 | macrophage scavenger receptor 2 (Msr2), mRNA.                                          |
| 68701  | <i>Dysfip1</i>       | 0.829 | 1.8 | 0.045 | 0.386  | -0.343 | -0.043 | 0.689 | 0.584 | 1.214 | dysferlin interacting protein 1 (Dysfip1), mRNA.                                       |
| 20363  | <i>Sepp1</i>         | 0.827 | 1.8 | 0.029 | 0.249  | -0.228 | -0.021 | 0.555 | 0.697 | 1.229 | selenoprotein P, plasma, 1 (Sepp1), transcript variant 2, mRNA.                        |
| 67896  | <i>Ccdc80</i>        | 0.823 | 1.8 | 0.017 | 0.216  | -0.237 | 0.021  | 0.673 | 1.147 | 0.647 | coiled-coil domain containing 80 (Ccdc80), mRNA.                                       |
| 15199  | <i>Hebp1</i>         | 0.816 | 1.8 | 0.025 | -0.018 | -0.308 | 0.326  | 0.597 | 0.769 | 1.083 | heme binding protein 1 (Hebp1), mRNA.                                                  |
| 215280 | <i>Wipf1</i>         | 0.789 | 1.7 | 0.017 | 0.118  | -0.318 | 0.200  | 0.661 | 0.678 | 1.028 | WAS/WASL interacting protein family, member 1 (Wipf1), mRNA.                           |
| 110454 | <i>Ly6a</i>          | 0.774 | 1.7 | 0.048 | 0.401  | -0.291 | -0.111 | 0.438 | 0.826 | 1.057 | lymphocyte antigen 6 complex, locus A (Ly6a), mRNA.                                    |
| 19231  | <i>Ptma</i>          | 0.773 | 1.7 | 0.004 | -0.018 | -0.123 | 0.141  | 0.781 | 0.589 | 0.949 | PREDICTED: similar to prothymosin alpha (LOC100044779), misc RNA.                      |
| 93694  | <i>Clec2d</i>        | 0.773 | 1.7 | 0.030 | 0.423  | -0.280 | -0.142 | 0.689 | 0.671 | 0.958 | C-type lectin domain family 2, member d (Clec2d), mRNA.                                |
| 13723  | <i>Emb</i>           | 0.772 | 1.7 | 0.028 | 0.281  | -0.318 | 0.037  | 0.606 | 0.642 | 1.068 | embigin (Emb), mRNA.                                                                   |
| 14609  | <i>Gja1</i>          | 0.767 | 1.7 | 0.024 | 0.294  | -0.395 | 0.101  | 0.883 | 0.769 | 0.650 | gap junction membrane channel protein alpha 1 (Gja1), mRNA.                            |
